# Supplementary material
Source: PubMed Central journal article supplement (PMC3781191)
Supplement: epi-8-720-s01.pdf [file epi-8-720-s01.pdf]

## **Supplemental Material to:**

**Silvia Martinelli, Meena Kanduri, Rossana Maffei, Stefania Fiorcari, Jenny Bulgarelli, Roberto Marasca and Richard Rosenquist**

**ANGPT2 promoter methylation is strongly associated with gene expression and prognosis in chronic lymphocytic leukemia**

**Epigenetics 2013; 8(7)**

**<http://dx.doi.org/10.4161/epi.24947>**

**[http://www.landesbioscience.com/journals/epigenetics/  
article/24947/](http://www.landesbioscience.com/journals/epigenetics/article/24947/)**

**Supplementary Table 1.** Time to first treatment (TTFT) and overall survival (OS) of 88 CLL patients in relation to classical prognostic factors

|                        | TTFT<br>(median<br>months) | N° treated<br>cases | P-value | OS<br>(median<br>months) | N° dead<br>cases | P-value |
|------------------------|----------------------------|---------------------|---------|--------------------------|------------------|---------|
| Clinical stage         |                            |                     |         |                          |                  |         |
| Binet A                | 117                        | 15/40               | <0.001  | 177                      | 15/50            | 0.003   |
| Binet B-C              | 2                          | 14/19               |         | 72                       | 15/26            |         |
| IGHV mutational status |                            |                     |         |                          |                  |         |
| Mutated (<98%)         | 117                        | 10/35               | <0.001  | 177                      | 14/46            | <0.001  |
| Unmutated (≥98%)       | 18                         | 20/27               |         | 61                       | 22/40            |         |
| CD38                   |                            |                     |         |                          |                  |         |
| CD38 negative (<30%)   | 97                         | 16/39               | 0.010   | 121                      | 21/54            | 0.011   |
| CD38 positive (≥30%)   | 5                          | 9/12                |         | 57                       | 14/21            |         |
| FISH stratification    |                            |                     |         |                          |                  |         |
| Low risk               | 97                         | 13/35               | <0.001  | 177                      | 16/49            | <0.001  |
| Intermediate/high risk | 3                          | 14/16               |         | 61                       | 15/23            |         |

Legend: Low FISH risk = no abnormalities or del(13q); Intermediate/high FISH risk = del(11q), del(17p) or trisomy 12.

Abbreviations: FISH = fluorescence in situ hybridization; IGHV = variable region of immunoglobulin heavy chain genes.

**Supplementary Table 2.** Levels of ANGPT2 expression and CpG methylation compared between PBMCs and sorted B cell samples

| Case number | Sample type | IGHV mutational status | Relative ANGPT2 mRNA expression to B2M | Meth % CpG Site 1 | Meth % CpG Site 2 | Meth % CpG Site 3 | Meth % CpG Site 4 | Meth % CpG Site 5 | Meth % CpG Site 6 | Meth % average all CpG sites |
|-------------|-------------|------------------------|----------------------------------------|-------------------|-------------------|-------------------|-------------------|-------------------|-------------------|------------------------------|
| CLL 1       | PBMCs       | UM                     | 8,75x10 <sup>-5</sup>                  | 56                | 22                | 46                | 26                | 18                | 42                | 35                           |
| CLL 2       | PBMCs       | UM                     | 2,75x10 <sup>-5</sup>                  | 83                | 45                | 89                | 66                | 35                | 69                | 65                           |
| CLL 3       | PBMCs       | M                      | 0                                      | 93                | 72                | 100               | 83                | 35                | 75                | 76                           |
| CLL 4       | PBMCs       | UM                     | 6,12x10 <sup>-4</sup>                  | 58                | 23                | 36                | 29                | 28                | 56                | 38                           |
| CLL 5       | PBMCs       | M                      | 7,43x10 <sup>-4</sup>                  | 56                | 42                | 73                | 47                | 24                | 53                | 49                           |
| CLL 6       | PBMCs       | UM                     | 6,85x10 <sup>-5</sup>                  | 77                | 48                | 100               | 75                | 31                | 69                | 67                           |
| CLL 7       | PBMCs       | M                      | 2,93x10 <sup>-6</sup>                  | 91                | 75                | 100               | 91                | 31                | 78                | 78                           |
| CLL 8       | PBMCs       | M                      | 8,91x10 <sup>-7</sup>                  | 93                | 72                | 100               | 84                | 63                | 80                | 82                           |
| CLL 1       | sorted      |                        | 3,30x10 <sup>-4</sup>                  | 53                | 29                | 45                | 32                | 35                | 32                | 38                           |
| CLL 2       | sorted      |                        | 1,12x10 <sup>-4</sup>                  | 72                | 34                | 100               | 62                | 65                | 26                | 60                           |
| CLL 3       | sorted      |                        | 0                                      | 100               | 64                | 100               | 100               | 78                | 64                | 84                           |
| CLL 4       | sorted      |                        | 1,90x10 <sup>-3</sup>                  | 47                | 11                | 25                | 39                | 28                | 26                | 29                           |
| CLL 5       | sorted      |                        | 2,01x10 <sup>-3</sup>                  | 41                | 26                | 100               | 48                | 44                | 32                | 49                           |
| CLL 6       | sorted      |                        | 6,40x10 <sup>-5</sup>                  | 64                | 37                | 100               | 97                | 54                | 57                | 68                           |
| CLL 7       | sorted      |                        | 0                                      | 100               | 60                | 100               | 100               | 67                | 69                | 83                           |
| CLL 8       | sorted      |                        | 0                                      | 100               | 65                | 100               | 100               | 72                | 69                | 84                           |
| HD 1        | sorted      |                        | 0                                      | 100               | 58                | 100               | 100               | 100               | 64                | 87                           |
| HD 2        | sorted      |                        | 2,22x10 <sup>-6</sup>                  | 100               | 60                | 100               | 100               | 100               | 60                | 87                           |

Abbreviations: CLL = chronic lymphocytic leukemia; HD = healthy donor; PBMCs = peripheral blood mononuclear cells; sorted = sorted B cells; IGHV = immunoglobulin heavy chain variable genes; UM = unmutated; M = mutated; Meth % = methylation percentage.

**Supplementary Table 3.** *ANGPT2* CpG methylation percentages and apoptotic cell rates in MEC1 and RAMOS cell lines after 72 hours of DAC/TSA treatment in a representative experiment

|       | Treatment            | Meth %<br>CpG 1 | Meth %<br>CpG 2 | Meth %<br>CpG 3 | Meth %<br>CpG 4 | Meth %<br>CpG 5 | Meth %<br>CpG 6 | Meth %<br>average<br>all CpG<br>sites | Apoptotic<br>cell rate<br>(%) |
|-------|----------------------|-----------------|-----------------|-----------------|-----------------|-----------------|-----------------|---------------------------------------|-------------------------------|
| MEC1  | control              | 100             | 53              | 100             | 100             | 100             | 60              | 86                                    | 4.1                           |
| MEC1  | 5 $\mu$ M DAC        | 50              | 29              | 100             | 57              | 100             | 27              | 61                                    | 2.5                           |
| MEC1  | 10 $\mu$ M DAC       | 40              | 33              | 100             | 68              | 46              | 35              | 54                                    | 9.8                           |
| MEC1  | 10 $\mu$ M DAC + TSA | 19              | 26              | 95              | 28              | 33              | 19              | 37                                    | 35.3                          |
| RAMOS | control              | 100             | 63              | 100             | 100             | 85              | 78              | 88                                    | 10.1                          |
| RAMOS | 5 $\mu$ M DAC        | 45              | 42              | 100             | 49              | 58              | 33              | 55                                    | 3.9                           |
| RAMOS | 10 $\mu$ M DAC       | 39              | 37              | 100             | 44              | 32              | 27              | 47                                    | 1.4                           |
| RAMOS | 10 $\mu$ M DAC + TSA | 15              | 22              | 86              | 25              | 30              | 16              | 32                                    | 37.9                          |

Abbreviations: DAC = 5-aza-2'-deoxycytidine; TSA = Trichostatin A; Meth % = methylation percentage.

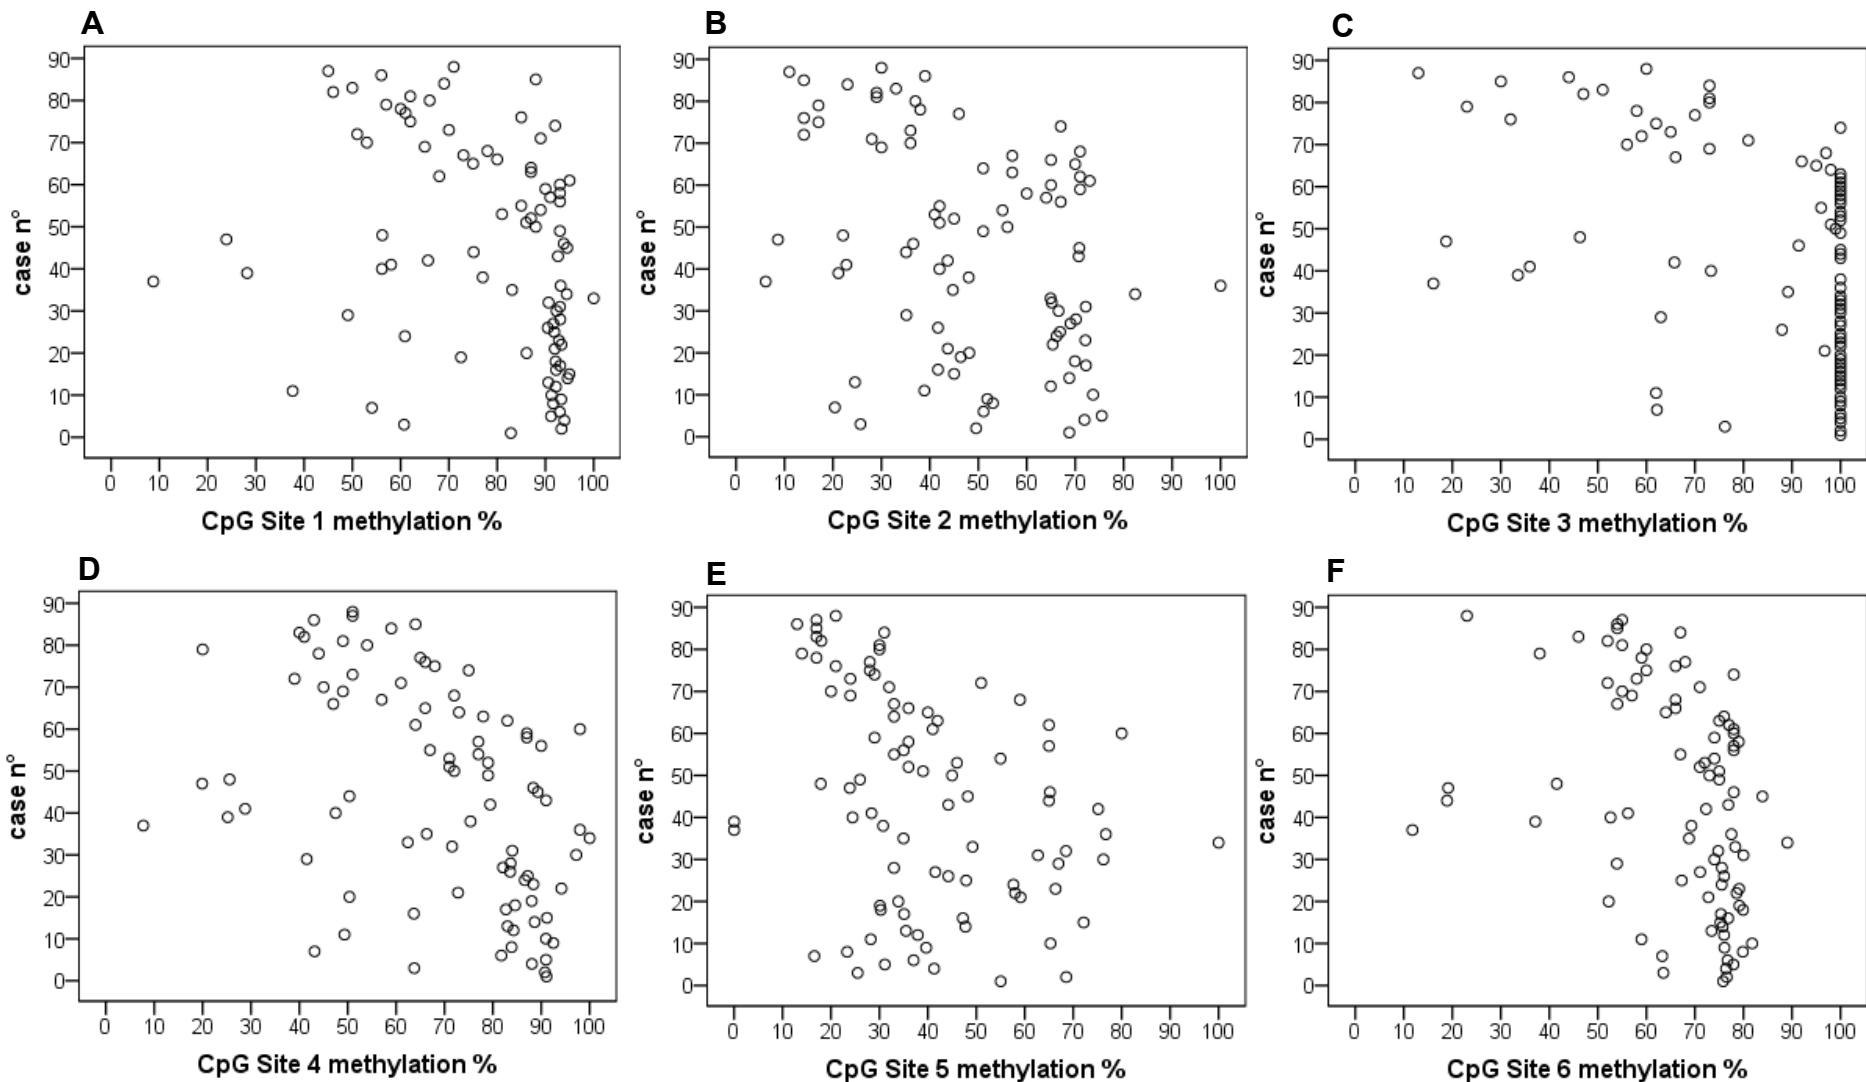

**Supplementary Figure 1.** The scatter plots show the distributions of methylation percentages (%) for each CpG site among 88 CLL cases. CpG site 1 is represented in panel A, CpG site 2 in panel B, CpG site 3 in panel C, CpG site 4 in panel D, CpG site 5 in panel E and CpG site in panel F.

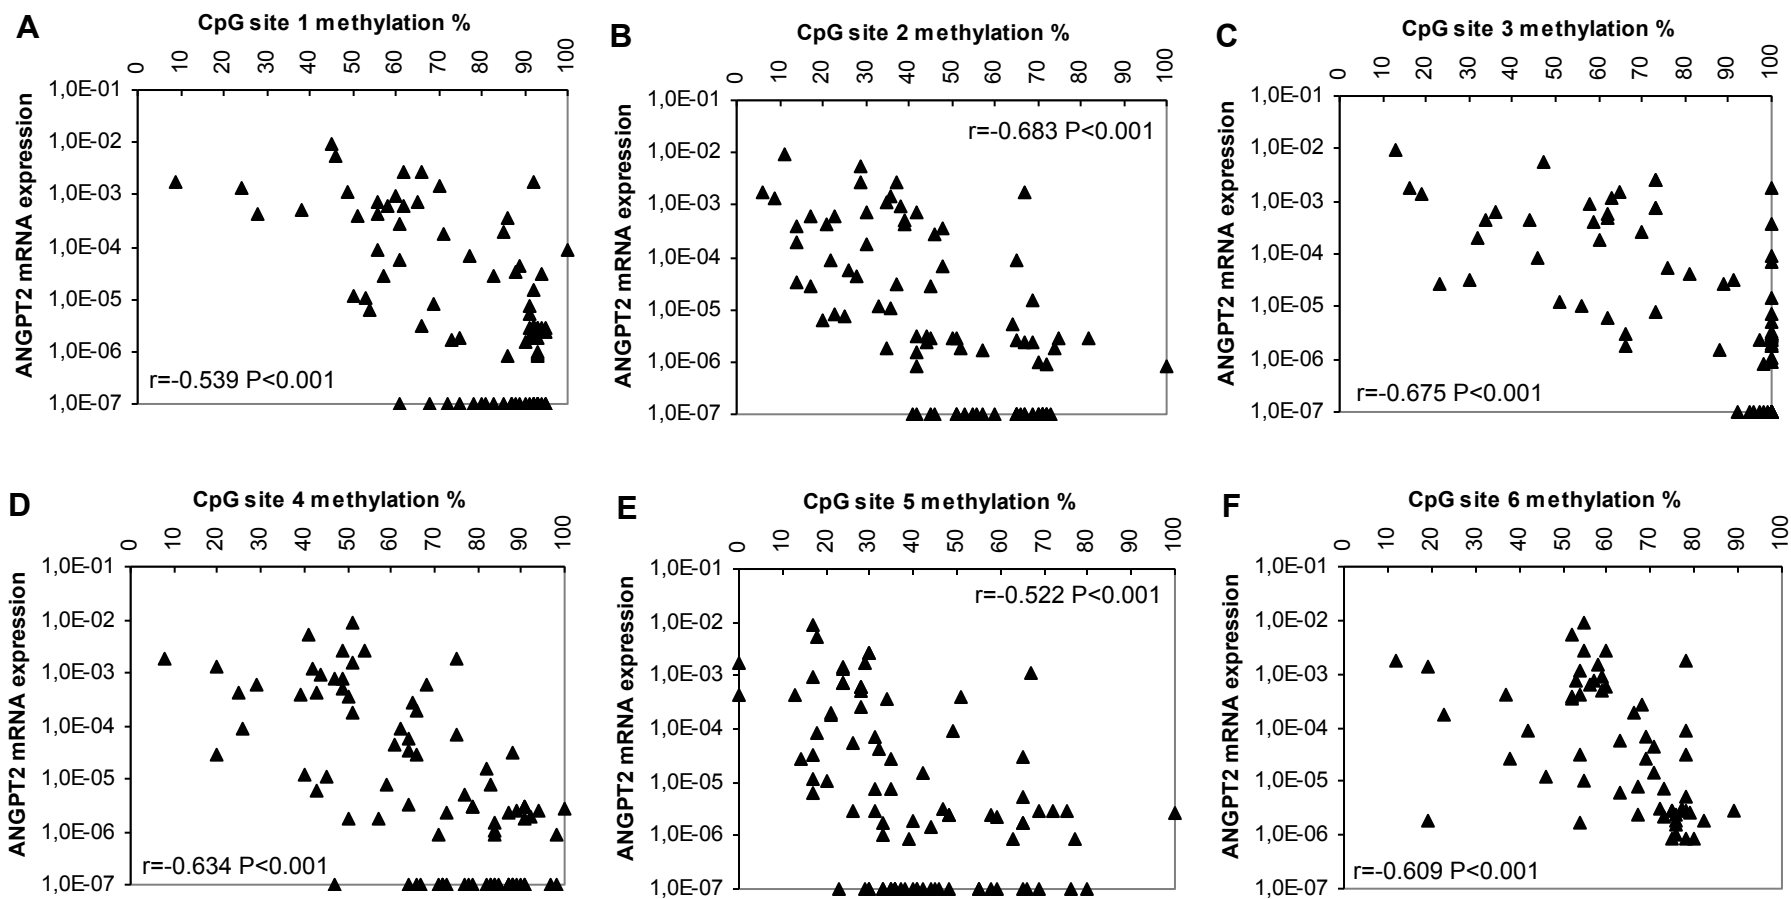

**Supplementary Figure 2.** The scatter plots show the inverse correlations between the relative *ANGPT2* mRNA expression to B2M (in log<sub>10</sub> scale) and the methylation percentage (%) for each CpG site in 88 CLL patients (all Spearman tests).  $1 \times 10^{-7}$  value coincides with the max sensibility of the RQ-PCR method for *ANGPT2* mRNA expression and here is used instead of zero. CpG site 1 is shown in panel A, CpG site 2 in panel B, CpG site 3 in panel C, CpG site 4 in panel D, CpG site 5 in panel E and CpG site 6 in panel F.
